# Supplementary material for: Bimagnetic urchin-like Co3O4/CoFe2O4 nanocomposites: synthesis and magnetic properties
Source: Royal Society of Chemistry journal article supplement (doi:10.1039/c6ra18846j), 2016-01-01
Supplement: c6ra18846j1.pdf [file c6ra18846j1.pdf]

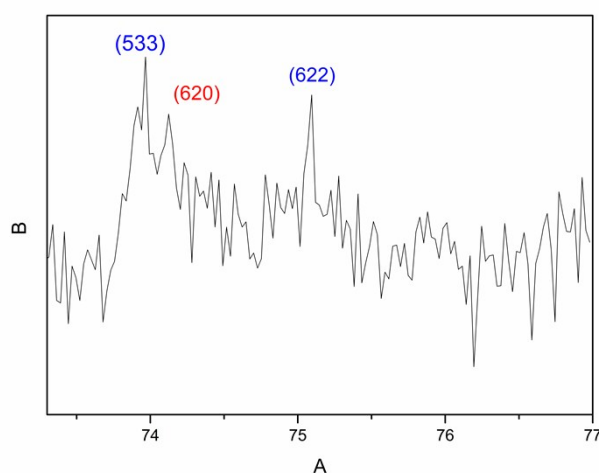

Fig. S1 XRD pattern of the local magnification urchin-like  $\text{Co}_3\text{O}_4/\text{CoFe}_2\text{O}_4$  nanocomposites  $(\text{Fe})/(\text{Fe}+\text{Co})=0.16$ .

Table 1. ICP analysis results of the  $\text{Co}_3\text{O}_4/\text{CoFe}_2\text{O}_4$  nanocomposite

|                                          | Co         | Fe         | $(\text{Fe})/(\text{Fe}+\text{Co})$ |
|------------------------------------------|------------|------------|-------------------------------------|
| $(\text{Fe})/(\text{Fe}+\text{Co})=0.16$ | 15.25 mg/L | 2.57mg/L   | 0.15                                |
| $(\text{Fe})/(\text{Fe}+\text{Co})=0.60$ | 21.58 mg/L | 22.36 mg/L | 0.52                                |

| Element | Atomic% | Atomic% |
|---------|---------|---------|
|         | a       | b       |
| Fe K    | 15.3    | 54.7    |
| Co K    | 84.7    | 45.3    |

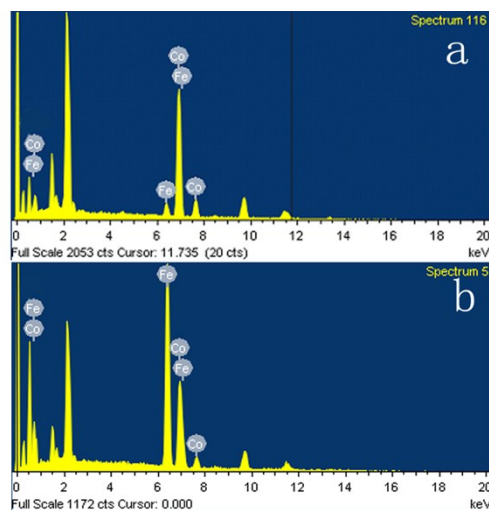

Fig. S2 EDS analysis results, (a)  $(\text{Fe})/(\text{Fe}+\text{Co})=0.16$ , (b)  $(\text{Fe})/(\text{Fe}+\text{Co})=0.60$ .

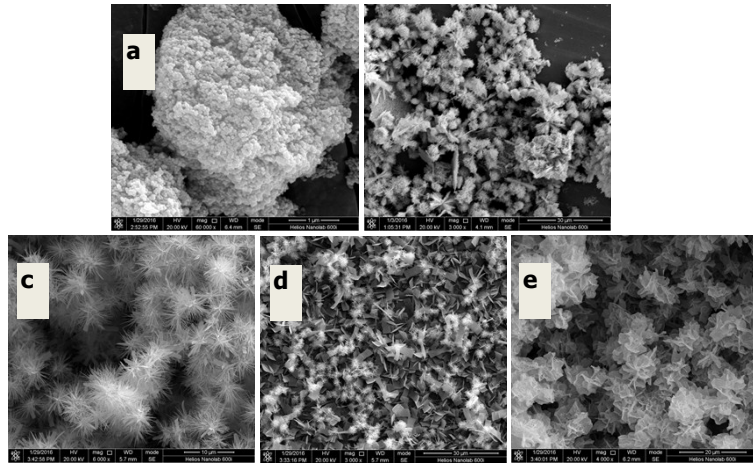

Fig.S3 FESEM micrographs of the as-prepared samples prepared at(a) 70°C, (b) 80°C, (c) 110°C, (d) 130°C and (e) 150°C.

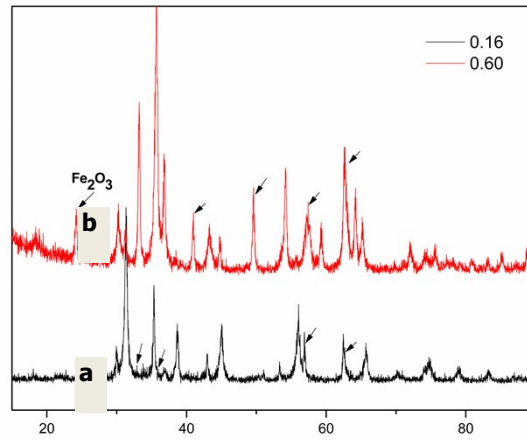

Fig. S4 XRD pattern of a real solid-solid reaction only by grinding the solid  $\text{Co}_3\text{O}_4$  and  $\text{CoFe}_2\text{O}_4$  mixture. (a)  $(\text{Fe})/(\text{Fe}+\text{Co})=0.16$ , (b)  $(\text{Fe})/(\text{Fe}+\text{Co})=0.60$ .
